# Supplementary material for: Integrated RNA-Seq and sRNA-Seq Analysis Identifies Chilling and Freezing Responsive Key Molecular Players and Pathways in Tea Plant (Camellia sinensis)
Source: PLoS One. 2015 Apr 22;10(4):e0125031. doi: 10.1371/journal.pone.0125031 (PMC4406609; doi:10.1371/journal.pone.0125031)
Supplement: S2 Table — (XLS) [file pone.0125031.s005.xls]

## Sheet: CT4vsCK.DE miRNAs
sRNA	CT4	CK	Log2-Fold Change	p-value	q-value
ath-miR172a	17536.9	7535.85	1.2185	0	0
novel_153	3793.47	9000.03	-1.2464	0	0
osa-miR398b	26421.1	120789	-2.1927	0	0
novel_1	2420.87	5165.28	-1.0933	1.0853e-232	8.4573e-232
ath-miR156a	1187.27	3038.74	-1.3558	8.3585e-191	5.0973e-190
novel_10	880.317	2178.83	-1.3075	4.0917e-130	2.1256e-129
ppe-miR398b	92.665	557.781	-2.5896	4.972e-83	2.3246e-82
han-miR1310	34.7494	371.854	-3.4197	2.4546e-72	1.1106e-71
ath-miR172c	1065.65	447.387	1.2521	1.4869e-56	5.3476e-56
novel_50	445.95	947.066	-1.0866	1.1331e-43	3.8763e-43
novel_115	110.04	389.285	-1.8228	1.0612e-38	3.4616e-38
cca-miR156b	231.662	540.35	-1.2219	1.8389e-30	5.488e-30
stu-miR156f-5p	231.662	540.35	-1.2219	1.8389e-30	5.488e-30
stu-miR398a-3p	28.9578	174.307	-2.5896	3.8207e-27	1.0718e-26
novel_46	225.871	505.489	-1.1622	1.3693e-26	3.6935e-26
novel_49	382.243	151.066	1.3393	1.3958e-23	3.6254e-23
novel_57	191.122	418.336	-1.1302	2.123e-21	5.0471e-21
mdm-miR535d	69.4987	226.599	-1.7051	2.4384e-21	5.7004e-21
osa-miR171i-3p	231.662	75.5328	1.6168	2.4696e-19	5.329e-19
stu-miR171b-3p	231.662	75.5328	1.6168	2.4696e-19	5.329e-19
lus-miR398f	11.5831	87.1533	-2.9115	5.2629e-16	1.0546e-15
novel_48	17.3747	98.7737	-2.5071	1.4709e-15	2.9058e-15
ath-miR393a	144.789	40.6715	1.8319	7.8235e-15	1.4829e-14
osa-miR393a	144.789	40.6715	1.8319	7.8235e-15	1.4829e-14
ppe-miR393a	144.789	40.6715	1.8319	7.8235e-15	1.4829e-14
novel_60	23.1662	92.9635	-2.0046	1.3096e-11	2.355e-11
novel_138	57.9156	145.255	-1.3266	2.43e-10	4.1064e-10
ath-miR157a	69.4987	162.686	-1.227	2.7188e-10	4.4865e-10
hbr-miR156	69.4987	162.686	-1.227	2.7188e-10	4.4865e-10
sbi-miR172b	115.831	40.6715	1.5099	1.527e-09	2.4906e-09
novel_151	28.9578	92.9635	-1.6827	1.7522e-09	2.8249e-09
novel_148	17.3747	69.7226	-2.0046	4.6049e-09	7.2573e-09
ptc-miR393a-3p	98.4566	34.8613	1.4979	3.089e-08	4.7613e-08
mtr-miR156j	0	23.2409	-5.5386	4.8488e-07	7.1591e-07
novel_97	0	23.2409	-5.5386	4.8488e-07	7.1591e-07
osa-miR5083	0	23.2409	-5.5386	4.8488e-07	7.1591e-07
novel_74	23.1662	69.7226	-1.5896	5.4922e-07	8.0245e-07
novel_64	69.4987	139.445	-1.0046	5.9224e-07	8.5639e-07
osa-miR399a	23.1662	0	5.534	6.2328e-07	8.9208e-07
novel_152	11.5831	46.4817	-2.0046	1.707e-06	2.3706e-06
novel_104	34.7494	5.81022	2.5803	2.2853e-06	3.1426e-06
novel_100	23.1662	63.9124	-1.4641	6.2183e-06	8.3066e-06
novel_109	23.1662	63.9124	-1.4641	6.2183e-06	8.3066e-06
ptc-miR396f	63.7072	23.2409	1.4548	1.3259e-05	1.722e-05
ath-miR156h	0	17.4307	-5.1236	1.4678e-05	1.8382e-05
novel_110	0	17.4307	-5.1236	1.4678e-05	1.8382e-05
novel_114	0	17.4307	-5.1236	1.4678e-05	1.8382e-05
ptc-miR156k	0	17.4307	-5.1236	1.4678e-05	1.8382e-05
novel_123	17.3747	0	5.1189	1.7967e-05	2.2302e-05
gma-miR5368	28.9578	69.7226	-1.2677	2.2563e-05	2.7519e-05
hci-miR156a	5.79156	29.0511	-2.3266	3.3812e-05	4.0191e-05
ath-miR399b	40.5409	11.6204	1.8027	4.7855e-05	5.5555e-05
gma-miR156z	69.4987	29.0511	1.2584	4.8717e-05	5.5555e-05
gma-miR159b-3p	69.4987	29.0511	1.2584	4.8717e-05	5.5555e-05
gma-miR159c	69.4987	29.0511	1.2584	4.8717e-05	5.5555e-05
novel_80	69.4987	29.0511	1.2584	4.8717e-05	5.5555e-05
novel_82	46.3325	17.4307	1.4104	0.00028641	0.00031883
novel_105	11.5831	34.8613	-1.5896	0.00039809	0.00043967
sof-miR159e	34.7494	69.7226	-1.0046	0.00041397	0.00045363
ahy-miR156a	0	11.6204	-4.5386	0.00051932	0.00051297
aly-miR166g-5p	0	11.6204	-4.5386	0.00051932	0.00051297
cpa-miR8155	0	11.6204	-4.5386	0.00051932	0.00051297
gma-miR156g	0	11.6204	-4.5386	0.00051932	0.00051297
novel_145	0	11.6204	-4.5386	0.00051932	0.00051297
osa-miR156k	0	11.6204	-4.5386	0.00051932	0.00051297
osa-miR530-5p	0	11.6204	-4.5386	0.00051932	0.00051297
ppe-miR1511-3p	0	11.6204	-4.5386	0.00051932	0.00051297
ptc-miR530a	0	11.6204	-4.5386	0.00051932	0.00051297
rgl-miR5139	0	11.6204	-4.5386	0.00051932	0.00051297
sly-miR482a	0	11.6204	-4.5386	0.00051932	0.00051297
stu-miR530	0	11.6204	-4.5386	0.00051932	0.00051297
tcc-miR530a	0	11.6204	-4.5386	0.00051932	0.00051297
vvi-miR156e	0	11.6204	-4.5386	0.00051932	0.00051297
ath-miR399a	11.5831	0	4.534	0.00060235	0.00057475
gma-miR4995	11.5831	0	4.534	0.00060235	0.00057475
osa-miR397b	11.5831	0	4.534	0.00060235	0.00057475
pab-miR1863	11.5831	0	4.534	0.00060235	0.00057475
novel_83	5.79156	23.2409	-2.0046	0.00071509	0.00067771
aqc-miR171f	52.1241	23.2409	1.1653	0.00094811	0.00088657
aly-miR167b-3p	23.1662	5.81022	1.9954	0.00098703	0.00090487
gma-miR166m	23.1662	5.81022	1.9954	0.00098703	0.00090487
pde-miR159	23.1662	5.81022	1.9954	0.00098703	0.00090487

## Sheet: CT8vsCK.DE miRNAs
sRNA	CT8	CK	Log2-Fold Change	p-value	q-value
ath-miR408	25711.7	9231.34	1.4778	0	0
gma-miR408d	25765.4	9242.61	1.4791	0	0
novel_153	3192	8729.76	-1.4515	0	0
novel_8	28239.9	12150.7	1.2167	0	0
osa-miR408-3p	26028.9	9372.23	1.4737	0	0
ppt-miR408b	27971.5	9704.74	1.5272	0	0
novel_49	849.247	146.529	2.535	1.7219e-110	2.9951e-110
ptc-miR319e	107.376	529.759	-2.3027	1.3779e-74	1.8642e-74
ath-miR319c	107.376	524.124	-2.2872	2.8137e-73	3.6708e-73
ath-miR398b	1225.06	557.938	1.1347	2.517e-47	2.8732e-47
novel_57	122.018	405.773	-1.7336	1.8853e-41	2.0255e-41
ahy-miR398	859.009	388.866	1.1434	3.8356e-34	3.6871e-34
ath-miR398a	859.009	388.866	1.1434	3.8356e-34	3.6871e-34
htu-miR171a	336.771	681.924	-1.0178	9.339e-34	8.5285e-34
osa-miR171b	336.771	681.924	-1.0178	9.339e-34	8.5285e-34
han-miR1310	122.018	360.687	-1.5637	1.3673e-32	1.2182e-32
novel_46	229.394	490.309	-1.0959	2.4631e-27	2.0448e-27
novel_53	507.596	214.158	1.245	5.2396e-24	4.0723e-24
novel_138	24.4037	140.893	-2.5294	3.741e-23	2.8469e-23
mdm-miR535d	68.3303	219.794	-1.6856	1.8933e-22	1.4114e-22
ppt-miR319a	24.4037	135.258	-2.4705	8.7097e-22	6.2383e-22
pta-miR319	24.4037	135.258	-2.4705	8.7097e-22	6.2383e-22
ath-miR164a	34.1651	140.893	-2.044	1.3939e-18	9.0921e-19
ath-miR164c	34.1651	140.893	-2.044	1.3939e-18	9.0921e-19
gma-miR164b	34.1651	140.893	-2.044	1.3939e-18	9.0921e-19
osa-miR164d	43.9266	157.801	-1.8449	2.19e-18	1.4035e-18
novel_13	327.009	140.893	1.2147	2.0966e-15	1.2764e-15
novel_72	9.76147	73.2646	-2.9079	1.9694e-14	1.1603e-14
ath-miR157a	68.3303	157.801	-1.2075	4.5871e-11	2.3272e-11
hbr-miR156	68.3303	157.801	-1.2075	4.5871e-11	2.3272e-11
ppt-miR166j	92.7339	185.979	-1.004	3.8385e-10	1.9208e-10
novel_48	34.1651	95.8076	-1.4876	3.1098e-09	1.5146e-09
novel_109	14.6422	61.9931	-2.082	3.6422e-09	1.7506e-09
lus-miR398f	29.2844	84.5361	-1.5294	1.4226e-08	6.6621e-09
ath-miR319a	0	28.1787	-5.8165	1.8027e-08	8.2313e-09
novel_60	34.1651	90.1718	-1.4002	3.4472e-08	1.5356e-08
aau-miR160	58.5688	118.351	-1.0149	4.8211e-07	1.9142e-07
csi-miR160	58.5688	118.351	-1.0149	4.8211e-07	1.9142e-07
gma-miR160b	58.5688	118.351	-1.0149	4.8211e-07	1.9142e-07
mtr-miR156j	0	22.543	-5.4946	4.7722e-07	1.9142e-07
mtr-miR319a-3p	0	22.543	-5.4946	4.7722e-07	1.9142e-07
novel_101	63.4495	16.9072	1.908	4.539e-07	1.9142e-07
osa-miR5083	0	22.543	-5.4946	4.7722e-07	1.9142e-07
novel_117	39.0459	90.1718	-1.2075	6.4664e-07	2.5128e-07
novel_151	39.0459	90.1718	-1.2075	6.4664e-07	2.5128e-07
ptc-miR393a-3p	92.7339	33.8144	1.4555	7.9681e-07	3.0638e-07
aly-miR167b-3p	34.1651	5.63574	2.5998	5.4343e-06	1.9851e-06
pde-miR159	34.1651	5.63574	2.5998	5.4343e-06	1.9851e-06
cme-miR172f	19.5229	0	5.2871	7.2353e-06	2.5911e-06
novel_110	0	16.9072	-5.0796	1.4324e-05	4.9831e-06
novel_148	29.2844	67.6289	-1.2075	1.6329e-05	5.6271e-06
osa-miR160d-3p	9.76147	33.8144	-1.7925	6.9997e-05	2.3245e-05
tcc-miR172d	24.4037	56.3574	-1.2075	8.3399e-05	2.7201e-05
gma-miR4995	14.6422	0	4.8721	0.00012275	3.8991e-05
mtr-miR393b-3p	14.6422	0	4.8721	0.00012275	3.8991e-05
novel_123	14.6422	0	4.8721	0.00012275	3.8991e-05
novel_100	29.2844	61.9931	-1.082	0.00013594	4.2808e-05
gma-miR396b-3p	4.88073	22.543	-2.2075	0.00023288	7.1485e-05
novel_83	4.88073	22.543	-2.2075	0.00023288	7.1485e-05
ptc-miR396e-3p	4.88073	22.543	-2.2075	0.00023288	7.1485e-05
aly-miR166g-5p	0	11.2715	-4.4946	0.00050391	0.00014609
ath-miR171a	0	11.2715	-4.4946	0.00050391	0.00014609
vvi-miR156e	0	11.2715	-4.4946	0.00050391	0.00014609
zma-miR171a-3p	0	11.2715	-4.4946	0.00050391	0.00014609
ghr-miR156c	24.4037	50.7216	-1.0555	0.00069877	0.00020098
hbr-miR6173	43.9266	16.9072	1.3775	0.0011794	0.0003314
ptc-miR167h-5p	34.1651	11.2715	1.5998	0.0012136	0.00033841
ath-miR157d	9.76147	0	4.2871	0.0023343	0.00061789
ath-miR399a	9.76147	0	4.2871	0.0023343	0.00061789
nta-miR172b	9.76147	0	4.2871	0.0023343	0.00061789
osa-miR166i-3p	9.76147	0	4.2871	0.0023343	0.00061789
osa-miR397b	9.76147	0	4.2871	0.0023343	0.00061789
pab-miR1863	9.76147	0	4.2871	0.0023343	0.00061789
sly-miR397	9.76147	0	4.2871	0.0023343	0.00061789
ath-miR156h	4.88073	16.9072	-1.7925	0.0049288	0.0012503
hci-miR164a	4.88073	16.9072	-1.7925	0.0049288	0.0012503
novel_114	4.88073	16.9072	-1.7925	0.0049288	0.0012503
osa-miR164e	4.88073	16.9072	-1.7925	0.0049288	0.0012503
ptc-miR156k	4.88073	16.9072	-1.7925	0.0049288	0.0012503
gma-miR166m	19.5229	5.63574	1.7925	0.0075507	0.0018763
novel_149	19.5229	5.63574	1.7925	0.0075507	0.0018763
novel_127	29.2844	11.2715	1.3775	0.0080837	0.0019686
aly-miR166e-5p	0	5.63574	-3.4946	0.022025	0.0045177
ath-miR2111a-5p	0	5.63574	-3.4946	0.022025	0.0045177
cme-miR399d	0	5.63574	-3.4946	0.022025	0.0045177
gma-miR530a	0	5.63574	-3.4946	0.022025	0.0045177
hbr-miR6485	0	5.63574	-3.4946	0.022025	0.0045177
mdm-miR1511	0	5.63574	-3.4946	0.022025	0.0045177
mtr-miR172a	0	5.63574	-3.4946	0.022025	0.0045177
novel_3	0	5.63574	-3.4946	0.022025	0.0045177
osa-miR399j	0	5.63574	-3.4946	0.022025	0.0045177
osa-miR5072	0	5.63574	-3.4946	0.022025	0.0045177
ppe-miR399a	0	5.63574	-3.4946	0.022025	0.0045177
pta-miR156a	0	5.63574	-3.4946	0.022025	0.0045177
pta-miR156b	0	5.63574	-3.4946	0.022025	0.0045177
ptc-miR172i	0	5.63574	-3.4946	0.022025	0.0045177
ptc-miR2111a	0	5.63574	-3.4946	0.022025	0.0045177
ptc-miR399e	0	5.63574	-3.4946	0.022025	0.0045177
sbi-miR169d-5p	0	5.63574	-3.4946	0.022025	0.0045177
vvi-miR399i	0	5.63574	-3.4946	0.022025	0.0045177
zma-miR159h-3p	0	5.63574	-3.4946	0.022025	0.0045177
novel_120	24.4037	11.2715	1.1144	0.044929	0.0086814

## Sheet: FT4vsCK.DE miRNAs
sRNA	FT4	CK	Log2-Fold Change	p-value	q-value
osa-miR398b	35916.8	121683	-1.7604	0	0
novel_10	847.128	2194.97	-1.3735	8.8922e-137	4.4327e-137
gma-miR5368	710.726	70.2389	3.339	4.1211e-132	1.9565e-132
zma-miR398a-3p	552.787	1422.34	-1.3635	2.6524e-88	1.0578e-88
ppe-miR398b	129.223	561.911	-2.1205	2.4768e-65	8.8192e-66
hbr-miR6173	294.341	17.5597	4.0671	4.5689e-64	1.5707e-64
ahy-miR398	114.865	403.874	-1.814	5.8805e-39	1.6286e-39
ath-miR398a	114.865	403.874	-1.814	5.8805e-39	1.6286e-39
novel_57	129.223	421.433	-1.7054	2.1939e-37	5.4682e-38
novel_53	559.966	222.423	1.332	1.5072e-34	3.6649e-35
novel_115	122.044	392.167	-1.6841	2.5408e-34	6.0314e-35
novel_46	201.013	509.232	-1.341	5.8199e-32	1.3187e-32
osa-miR171i-3p	272.804	76.0921	1.842	2.4135e-27	5.1197e-28
stu-miR171b-3p	272.804	76.0921	1.842	2.4135e-27	5.1197e-28
ath-miR398b	272.804	579.471	-1.0869	2.0959e-26	4.3534e-27
gma-miR4995	100.507	0	7.6511	1.8014e-23	3.592e-24
novel_138	28.7162	146.331	-2.3493	1.7838e-20	3.2934e-21
gma-miR403a	14.3581	93.6519	-2.7054	9.5481e-16	1.5866e-16
stu-miR398a-3p	57.4324	175.597	-1.6123	2.2999e-15	3.6983e-16
cpa-miR8155	78.9696	11.7065	2.754	1.0019e-13	1.4909e-14
ppe-miR1511-3p	78.9696	11.7065	2.754	1.0019e-13	1.4909e-14
rgl-miR5139	78.9696	11.7065	2.754	1.0019e-13	1.4909e-14
sbi-miR172b	122.044	40.9727	1.5747	8.7752e-11	1.2498e-11
novel_148	14.3581	70.2389	-2.2904	2.4719e-10	3.4711e-11
ath-miR157a	71.7905	163.891	-1.1909	1.1735e-09	1.5599e-10
hbr-miR156	71.7905	163.891	-1.1909	1.1735e-09	1.5599e-10
osa-miR164d	71.7905	163.891	-1.1909	1.1735e-09	1.5599e-10
pab-miR3711	71.7905	17.5597	2.0315	3.0188e-09	3.9088e-10
aly-miR172e-3p	165.118	76.0921	1.1177	6.8117e-09	8.5965e-10
ath-miR172e	165.118	76.0921	1.1177	6.8117e-09	8.5965e-10
ath-miR164a	64.6115	146.331	-1.1794	1.1665e-08	1.4183e-09
ath-miR164c	64.6115	146.331	-1.1794	1.1665e-08	1.4183e-09
gma-miR164b	64.6115	146.331	-1.1794	1.1665e-08	1.4183e-09
ath-miR319a	0	29.2662	-5.8712	1.812e-08	2.1507e-09
novel_119	35.8953	99.5051	-1.471	2.445e-08	2.8678e-09
tcc-miR172d	14.3581	58.5324	-2.0274	8.6708e-08	9.9365e-09
novel_103	50.2534	11.7065	2.1019	3.9449e-07	4.4693e-08
mtr-miR319a-3p	0	23.413	-5.5492	4.8598e-07	5.3836e-08
ptc-miR396f	0	23.413	-5.5492	4.8598e-07	5.3836e-08
aly-miR167b-3p	35.8953	5.85324	2.6165	1.0564e-06	1.0971e-07
novel_149	35.8953	5.85324	2.6165	1.0564e-06	1.0971e-07
osa-miR159e	78.9696	29.2662	1.4321	1.1519e-06	1.184e-07
novel_101	57.4324	17.5597	1.7096	2.3633e-06	2.3561e-07
mes-miR159c	7.17905	35.1194	-2.2904	7.6393e-06	7.467e-07
novel_151	43.0743	93.6519	-1.1205	1.1851e-05	1.1471e-06
osa-miR172c	43.0743	11.7065	1.8795	1.281e-05	1.228e-06
ath-miR167c	0	17.5597	-5.1342	1.4748e-05	1.3742e-06
hci-miR164a	0	17.5597	-5.1342	1.4748e-05	1.3742e-06
osa-miR164e	0	17.5597	-5.1342	1.4748e-05	1.3742e-06
osa-miR159d	71.7905	29.2662	1.2946	1.7634e-05	1.5839e-06
sof-miR159c	71.7905	29.2662	1.2946	1.7634e-05	1.5839e-06
ath-miR393a	86.1486	40.9727	1.0722	5.182e-05	4.3783e-06
osa-miR393a	86.1486	40.9727	1.0722	5.182e-05	4.3783e-06
ppe-miR393a	86.1486	40.9727	1.0722	5.182e-05	4.3783e-06
lus-miR398f	43.0743	87.7986	-1.0274	7.7397e-05	6.4844e-06
novel_123	14.3581	0	4.8438	0.00010217	8.0842e-06
osa-miR1863a	14.3581	0	4.8438	0.00010217	8.0842e-06
osa-miR396c-3p	14.3581	0	4.8438	0.00010217	8.0842e-06
osa-miR396e-5p	14.3581	0	4.8438	0.00010217	8.0842e-06
osa-miR396f-5p	14.3581	0	4.8438	0.00010217	8.0842e-06
sly-miR4376	14.3581	0	4.8438	0.00010217	8.0842e-06
vvi-miR845d	14.3581	0	4.8438	0.00010217	8.0842e-06
ath-miR156g	7.17905	29.2662	-2.0274	0.00015382	1.1981e-05
hci-miR156a	7.17905	29.2662	-2.0274	0.00015382	1.1981e-05
mdm-miR159a	64.6115	29.2662	1.1426	0.00022424	1.7197e-05
pta-miR159c	64.6115	29.2662	1.1426	0.00022424	1.7197e-05
novel_18	21.5372	52.6792	-1.2904	0.0002395	1.8227e-05
vvi-miR3630-3p	14.3581	40.9727	-1.5128	0.00025835	1.9513e-05
aly-miR396b-3p	71.7905	35.1194	1.0315	0.00034417	2.5607e-05
ama-miR396-3p	71.7905	35.1194	1.0315	0.00034417	2.5607e-05
aly-miR166g-5p	0	11.7065	-4.5492	0.00052273	3.7765e-05
ath-miR399b	0	11.7065	-4.5492	0.00052273	3.7765e-05
sly-miR482a	0	11.7065	-4.5492	0.00052273	3.7765e-05
vvi-miR156e	0	11.7065	-4.5492	0.00052273	3.7765e-05
novel_83	50.2534	23.413	1.1019	0.0015744	0.00010751
novel_152	21.5372	46.8259	-1.1205	0.0019529	0.00013156
osa-miR160e-5p	21.5372	46.8259	-1.1205	0.0019529	0.00013156
pde-miR159	21.5372	5.85324	1.8795	0.0020333	0.00013515
sbi-miR172f	21.5372	5.85324	1.8795	0.0020333	0.00013515
osa-miR160d-3p	14.3581	35.1194	-1.2904	0.0027072	0.00017757
ath-miR157d	7.17905	0	3.8438	0.0095263	0.00052473
ath-miR169a	7.17905	0	3.8438	0.0095263	0.00052473
ath-miR169b	7.17905	0	3.8438	0.0095263	0.00052473
ath-miR5653	7.17905	0	3.8438	0.0095263	0.00052473
cme-miR172f	7.17905	0	3.8438	0.0095263	0.00052473
ctr-miR171	7.17905	0	3.8438	0.0095263	0.00052473
gma-miR156r	7.17905	0	3.8438	0.0095263	0.00052473
gma-miR169u	7.17905	0	3.8438	0.0095263	0.00052473
gma-miR169v	7.17905	0	3.8438	0.0095263	0.00052473
gma-miR171m	7.17905	0	3.8438	0.0095263	0.00052473
nta-miR172b	7.17905	0	3.8438	0.0095263	0.00052473
osa-miR166h-5p	7.17905	0	3.8438	0.0095263	0.00052473
osa-miR166i-3p	7.17905	0	3.8438	0.0095263	0.00052473
osa-miR172d-5p	7.17905	0	3.8438	0.0095263	0.00052473
pab-miR1863	7.17905	0	3.8438	0.0095263	0.00052473
ppt-miR171a	7.17905	0	3.8438	0.0095263	0.00052473
ppt-miR171b	7.17905	0	3.8438	0.0095263	0.00052473
ptc-miR171c	7.17905	0	3.8438	0.0095263	0.00052473
ptc-miR171k	7.17905	0	3.8438	0.0095263	0.00052473
sly-miR171d	7.17905	0	3.8438	0.0095263	0.00052473
tae-miR167b	7.17905	0	3.8438	0.0095263	0.00052473
vvi-miR171f	7.17905	0	3.8438	0.0095263	0.00052473
aly-miR166e-5p	0	5.85324	-3.5492	0.022854	0.0010452
ath-miR169h	0	5.85324	-3.5492	0.022854	0.0010452
ath-miR2111a-5p	0	5.85324	-3.5492	0.022854	0.0010452
ath-miR395a	0	5.85324	-3.5492	0.022854	0.0010452
cme-miR399d	0	5.85324	-3.5492	0.022854	0.0010452
gma-miR172d	0	5.85324	-3.5492	0.022854	0.0010452
hbr-miR6485	0	5.85324	-3.5492	0.022854	0.0010452
lus-miR172j	0	5.85324	-3.5492	0.022854	0.0010452
mdm-miR1511	0	5.85324	-3.5492	0.022854	0.0010452
mtr-miR172a	0	5.85324	-3.5492	0.022854	0.0010452
mtr-miR395a	0	5.85324	-3.5492	0.022854	0.0010452
mtr-miR395g	0	5.85324	-3.5492	0.022854	0.0010452
nta-miR156f	0	5.85324	-3.5492	0.022854	0.0010452
osa-miR395b	0	5.85324	-3.5492	0.022854	0.0010452
osa-miR399j	0	5.85324	-3.5492	0.022854	0.0010452
ppe-miR399a	0	5.85324	-3.5492	0.022854	0.0010452
pta-miR156a	0	5.85324	-3.5492	0.022854	0.0010452
pta-miR156b	0	5.85324	-3.5492	0.022854	0.0010452
ptc-miR172i	0	5.85324	-3.5492	0.022854	0.0010452
ptc-miR2111a	0	5.85324	-3.5492	0.022854	0.0010452
ptc-miR399e	0	5.85324	-3.5492	0.022854	0.0010452
sbi-miR169d-5p	0	5.85324	-3.5492	0.022854	0.0010452
smo-miR396	0	5.85324	-3.5492	0.022854	0.0010452
tae-miR395b	0	5.85324	-3.5492	0.022854	0.0010452
vvi-miR399i	0	5.85324	-3.5492	0.022854	0.0010452
ath-miR156h	7.17905	17.5597	-1.2904	0.033945	0.0015176
novel_110	7.17905	17.5597	-1.2904	0.033945	0.0015176
novel_114	7.17905	17.5597	-1.2904	0.033945	0.0015176
ptc-miR156k	7.17905	17.5597	-1.2904	0.033945	0.0015176
gma-miR166m	14.3581	5.85324	1.2946	0.054881	0.0023998
gma-miR530a	14.3581	5.85324	1.2946	0.054881	0.0023998
novel_104	14.3581	5.85324	1.2946	0.054881	0.0023998

## Sheet: FT8vsCK.DE miRNAs
sRNA	FT8	CK	Log2-Fold Change	p-value	q-value
osa-miR398b	26149.5	123029	-2.2341	0	0
ath-miR156a	1226.17	3095.11	-1.3358	1.1076e-175	1.6645e-175
ath-miR394a	2570.37	1118.5	1.2004	1.5149e-136	1.8213e-136
zma-miR398a-3p	511.45	1438.07	-1.4915	1.1234e-97	1.1744e-97
ppe-miR398b	85.2417	568.128	-2.7366	3.4881e-86	3.3548e-86
novel_10	1081.91	2219.25	-1.0365	5.4794e-84	5.0673e-84
novel_37	1265.51	485.276	1.3828	6.9905e-84	6.2253e-84
stu-miR408b-5p	445.88	1094.83	-1.296	2.0307e-60	1.5259e-60
hbr-miR6173	242.611	17.754	3.7724	1.5595e-51	1.1363e-51
gma-miR5368	340.967	71.016	2.2634	1.0394e-44	6.4082e-45
novel_115	118.027	396.506	-1.7482	3.2716e-35	1.7878e-35
stu-miR398a-3p	19.6712	177.54	-3.174	2.3259e-32	1.2428e-32
novel_57	163.926	426.096	-1.3781	6.8393e-27	3.289e-27
cca-miR156b	249.168	550.374	-1.1433	9.1501e-26	4.231e-26
stu-miR156f-5p	249.168	550.374	-1.1433	9.1501e-26	4.231e-26
lus-miR398f	6.55706	88.77	-3.759	2.8208e-19	1.1496e-19
novel_138	32.7853	147.95	-2.174	1.8403e-18	7.2538e-19
ath-miR393a	137.698	41.426	1.7329	5.7664e-14	2.1008e-14
osa-miR393a	137.698	41.426	1.7329	5.7664e-14	2.1008e-14
ppe-miR393a	137.698	41.426	1.7329	5.7664e-14	2.1008e-14
ppt-miR166j	72.1276	195.294	-1.437	5.9582e-14	2.1382e-14
gma-miR156z	111.47	29.59	1.9135	5.1075e-13	1.6159e-13
gma-miR4995	45.8994	0	6.5204	2.0924e-12	6.5337e-13
gma-miR159b-3p	104.913	29.59	1.826	1.0925e-11	3.243e-12
gma-miR159c	104.913	29.59	1.826	1.0925e-11	3.243e-12
novel_80	104.913	29.59	1.826	1.0925e-11	3.243e-12
ath-miR157a	65.5706	165.704	-1.3375	6.1954e-11	1.7734e-11
hbr-miR156	65.5706	165.704	-1.3375	6.1954e-11	1.7734e-11
novel_151	26.2282	94.688	-1.8521	2.9441e-10	8.3281e-11
novel_109	13.1141	65.098	-2.3115	1.5182e-09	4.2446e-10
aau-miR160	45.8994	124.278	-1.437	2.0987e-09	5.5453e-10
ath-miR160a	45.8994	124.278	-1.437	2.0987e-09	5.5453e-10
csi-miR160	45.8994	124.278	-1.437	2.0987e-09	5.5453e-10
gma-miR160b	45.8994	124.278	-1.437	2.0987e-09	5.5453e-10
pde-miR159	39.3423	5.918	2.7329	1.2126e-07	2.9452e-08
cca-miR396c	91.7988	35.508	1.3703	2.1088e-07	5.0204e-08
osa-miR5083	0	23.672	-5.5651	4.8707e-07	1.1482e-07
ghr-miR156c	13.1141	53.262	-2.022	5.2414e-07	1.2236e-07
ptc-miR393a-3p	85.2417	35.508	1.2634	2.5323e-06	5.7442e-07
novel_103	45.8994	11.836	1.9553	2.6022e-06	5.7933e-07
rgl-miR5139	45.8994	11.836	1.9553	2.6022e-06	5.7933e-07
cme-miR172f	19.6712	0	5.298	3.7369e-06	8.2434e-07
novel_105	6.55706	35.508	-2.437	4.0869e-06	8.9335e-07
novel_74	26.2282	71.016	-1.437	5.9566e-06	1.2903e-06
tcc-miR172d	19.6712	59.18	-1.589	8.1527e-06	1.7348e-06
novel_48	45.8994	100.606	-1.1322	8.5894e-06	1.8116e-06
osa-miR159d	72.1276	29.59	1.2854	1.1582e-05	2.4216e-06
ath-miR156h	0	17.754	-5.1501	1.484e-05	3.0239e-06
novel_114	0	17.754	-5.1501	1.484e-05	3.0239e-06
ptc-miR156k	0	17.754	-5.1501	1.484e-05	3.0239e-06
novel_72	32.7853	76.934	-1.2306	3.0816e-05	6.1236e-06
cpa-miR8155	39.3423	11.836	1.7329	5.9217e-05	1.1391e-05
novel_127	39.3423	11.836	1.7329	5.9217e-05	1.1391e-05
ppe-miR1511-3p	39.3423	11.836	1.7329	5.9217e-05	1.1391e-05
ath-miR156g	6.55706	29.59	-2.174	8.8378e-05	1.6732e-05
hci-miR156a	6.55706	29.59	-2.174	8.8378e-05	1.6732e-05
novel_121	65.5706	29.59	1.1479	0.0001257	2.3249e-05
osa-miR159e	65.5706	29.59	1.1479	0.0001257	2.3249e-05
novel_104	26.2282	5.918	2.1479	0.0001636	2.9577e-05
novel_148	32.7853	71.016	-1.1151	0.00022284	3.9398e-05
novel_52	45.8994	17.754	1.3703	0.00024306	4.235e-05
osa-miR166b-5p	45.8994	17.754	1.3703	0.00024306	4.235e-05
ath-miR399b	0	11.836	-4.5651	0.00052757	8.7485e-05
gma-miR156g	0	11.836	-4.5651	0.00052757	8.7485e-05
mtr-miR171c	0	11.836	-4.5651	0.00052757	8.7485e-05
novel_146	0	11.836	-4.5651	0.00052757	8.7485e-05
vvi-miR156e	0	11.836	-4.5651	0.00052757	8.7485e-05
novel_150	52.4565	23.672	1.1479	0.00060385	9.9447e-05
novel_102	19.6712	47.344	-1.2671	0.00081578	0.00013344
mtr-miR156j	6.55706	23.672	-1.8521	0.0016283	0.00025928
novel_83	6.55706	23.672	-1.8521	0.0016283	0.00025928
gma-miR166m	19.6712	5.918	1.7329	0.0045162	0.00069165
aly-miR172a-5p	6.55706	0	3.713	0.013539	0.0017134
ath-miR169b	6.55706	0	3.713	0.013539	0.0017134
ath-miR399a	6.55706	0	3.713	0.013539	0.0017134
gma-miR169v	6.55706	0	3.713	0.013539	0.0017134
gma-miR396a-3p	6.55706	0	3.713	0.013539	0.0017134
hbr-miR6483	6.55706	0	3.713	0.013539	0.0017134
mes-miR477i	6.55706	0	3.713	0.013539	0.0017134
mtr-miR393b-3p	6.55706	0	3.713	0.013539	0.0017134
osa-miR166i-3p	6.55706	0	3.713	0.013539	0.0017134
osa-miR396a-3p	6.55706	0	3.713	0.013539	0.0017134
osa-miR396c-3p	6.55706	0	3.713	0.013539	0.0017134
osa-miR399a	6.55706	0	3.713	0.013539	0.0017134
ptc-miR159c	6.55706	0	3.713	0.013539	0.0017134
ptc-miR166p	6.55706	0	3.713	0.013539	0.0017134
ptc-miR169q	6.55706	0	3.713	0.013539	0.0017134
ptc-miR169s	6.55706	0	3.713	0.013539	0.0017134
ptc-miR169u-5p	6.55706	0	3.713	0.013539	0.0017134
sly-miR4376	6.55706	0	3.713	0.013539	0.0017134
stu-miR4376-5p	6.55706	0	3.713	0.013539	0.0017134
vvi-miR2111-5p	6.55706	0	3.713	0.013539	0.0017134
zma-miR164h-5p	6.55706	0	3.713	0.013539	0.0017134
zma-miR396g-5p	6.55706	0	3.713	0.013539	0.0017134
novel_120	26.2282	11.836	1.1479	0.015297	0.0019157
aly-miR166e-5p	0	5.918	-3.5651	0.023087	0.0025464
ath-miR169h	0	5.918	-3.5651	0.023087	0.0025464
ath-miR2111a-5p	0	5.918	-3.5651	0.023087	0.0025464
ath-miR395a	0	5.918	-3.5651	0.023087	0.0025464
cme-miR399d	0	5.918	-3.5651	0.023087	0.0025464
gma-miR530a	0	5.918	-3.5651	0.023087	0.0025464
hbr-miR396a	0	5.918	-3.5651	0.023087	0.0025464
hbr-miR6485	0	5.918	-3.5651	0.023087	0.0025464
mdm-miR1511	0	5.918	-3.5651	0.023087	0.0025464
mtr-miR172a	0	5.918	-3.5651	0.023087	0.0025464
mtr-miR395a	0	5.918	-3.5651	0.023087	0.0025464
mtr-miR395g	0	5.918	-3.5651	0.023087	0.0025464
nta-miR156f	0	5.918	-3.5651	0.023087	0.0025464
osa-miR395b	0	5.918	-3.5651	0.023087	0.0025464
osa-miR399j	0	5.918	-3.5651	0.023087	0.0025464
osa-miR5072	0	5.918	-3.5651	0.023087	0.0025464
ppe-miR399a	0	5.918	-3.5651	0.023087	0.0025464
pta-miR156a	0	5.918	-3.5651	0.023087	0.0025464
pta-miR156b	0	5.918	-3.5651	0.023087	0.0025464
ptc-miR172i	0	5.918	-3.5651	0.023087	0.0025464
ptc-miR2111a	0	5.918	-3.5651	0.023087	0.0025464
ptc-miR399e	0	5.918	-3.5651	0.023087	0.0025464
sbi-miR169d-5p	0	5.918	-3.5651	0.023087	0.0025464
tae-miR395b	0	5.918	-3.5651	0.023087	0.0025464
vvi-miR399i	0	5.918	-3.5651	0.023087	0.0025464
novel_149	13.1141	5.918	1.1479	0.08636	0.0087616
novel_99	13.1141	5.918	1.1479	0.08636	0.0087616
zma-miR159h-3p	13.1141	5.918	1.1479	0.08636	0.0087616
